# Supplementary material for: Genetically proxied HTRA1 protease activity and circulating levels independently predict risk of ischemic stroke and coronary artery disease
Source: Research Square preprint supplement (doi:10.21203/rs.3.rs-3523612/v1), 2023-11-07
Supplement: Supplementary file 1 [file 427800c949df8600a9daf6fb.xlsx]

## Sheet: ST1
Suppl Table 1: Overview of the activity profile of 78 selected HTRA1 protease domain variants
Variant	HTRA1 activity normalized by HTRA1 level	standard error
S164G	0.43	0.304747
S164I	0.15	0.180448
R166C	0.07	0.18535
R166H	0.04	0.191206
I172M	0.16	0.199352
A173T	0.1	0.178873
A173V	0.43	0.358049
D174A	0.31	0.254305
V175L	0.26	0.252787
V175M	0.12	0.173029
K178N	0.74	0.359634
A180T	0.27	0.255615
A182T	1.15	0.527844
V183L	0.09	0.182291
V183M	0.07	0.202476
I186T	0.23	0.159159
E187K	0.48	0.270758
K191N	0.58	0.410515
K191T	0.76	0.430402
P193L	0.59	0.342929
R197Q	0.59	0.45061
P200L	0.65	0.350038
I208T	0.59	0.311681
S210L	0.28	0.290249
E211A	0.42	0.29458
G213R	not secreted	NA
G213V	not secreted	NA
I215V	1.18	0.504432
V221L	0.17	0.141733
V221M	0.18	0.146865
R227W	0.31	0.364638
V230A	0.56	0.39433
G235S	0.83	0.603574
E239K	0.95	0.423411
K243E	0.56	0.34038
K243R	0.59	0.284217
D244V	0.32	0.226205
K248T	0.57	0.412486
A252T	0.1	0.209754
I254T	0.36	0.302902
K255R	0.82	0.458095
I256T	0.57	0.414147
L262M	1.05	0.471756
P263S	0.99	0.576287
V264L	0.76	0.581593
R269C	1.06	0.526344
R269H	0.88	0.501947
S270F	0.44	0.299017
E272V	1.45	0.472433
R274Q	0.07	0.185394
F278L	0.09	0.193315
V279L	0.09	0.180465
V279M	0.05	0.201062
A281T	0.87	0.647211
G283R	0.04	0.226475
G295R	0.03	0.193274
V297M	0.04	0.19216
E306K	0.44	0.349516
G308R	0.07	0.184908
M314T	0.38	0.272926
M314V	0.42	0.243209
D320A	0.06	0.18803
D320N	0.07	0.185309
A321G	0.05	0.189418
A321T	0.77	0.608602
I322N	0.27	0.341225
N324S	0.33	0.274596
S328L	0.05	0.189888
P331L	0.04	0.190618
L335V	0.05	0.18837
G337R	0.11	0.18731
G337S	1.63	0.36072
V339A	0.58	0.376603
K346Q	0.79	0.390414
I355V	0.35	0.333182
P356L	0.08	0.200738
L364F	2.04	0.425326
E366G	0.62	0.281597

## Sheet: ST2
Suppl Table 2: Characteristics of European UKB participants
	HTRA1 variant carriers	HTRA1 variant non-carriers	p-value
N	834	424504
Age	57.35 (7.71)	56.53 (8.09)	0.0022
% male	0.4621	0.4578	0.81
SBP	142.7 (21.2)	141.0 (20.7)	0.07
DBP	85.0 (11.1)	84.3 (11.3)	0.21
LDL	3.51 (0.89)	3.55 (0.87)	0.17
TG	1.73 (1.02)	1.75 (1.02)	0.75
HDL	1.43 (0.37)	1.44 (0.38)	0.22
BMI	27.6 (4.6)	27.4 (4.8)	0.24
log WMH	0.59 (1.14)	0.02 (1.00)	0.00048
IS	0.0336	0.0213	0.014
CAD	0.1465	0.1172	0.000115
smoking index	0.45 (0.77)	0.41 (0.72)	0.14
